# Supplementary material for: Transient Hypermutagenesis Accelerates the Evolution of Legume Endosymbionts following Horizontal Gene Transfer
Source: PLoS Biol. 2014 Sep 2;12(9):e1001942. doi: 10.1371/journal.pbio.1001942 (PMC4151985; doi:10.1371/journal.pbio.1001942)
Supplement: Data S2 — Raw data for Figure 2 . (XLSX) [file pbio.1001942.s014.xlsx]

## Sheet: data Fig2B
Data S2: raw data for Figure 2B
Frequencies of spontaneous NalR mutants in bacterial popualtions before (T0) and after (T7) a 7-day incubation in Jensen medium
Strain	T0	T7
GMI1000	4.25531914893617E-10	2.31111111111111E-08
	6.62251655629139E-10	2.65700483091787E-08
	6.94444444444444E-10	8.994708994709E-08
	8.69565217391304E-10	1.52027027027027E-08
	1.05263157894737E-09	1.39784946236559E-08
	2.00308166409861E-09	9.90740740740741E-09
	2.16417910447761E-09	2.72619047619048E-08
	2.8030303030303E-09	1.64102564102564E-08
	2.98913043478261E-09	3.72168284789644E-08
	7.65027322404372E-09	2.04761904761905E-08
GMI1000 pRalta	2.73224043715847E-10	1.19273301737757E-06
	8.42105263157895E-10	2.01666666666667E-07
	8.48484848484848E-10	1.48670756646217E-07
	9.86193293885602E-10	4.81111111111111E-07
	1.20048019207683E-09	5.29032258064516E-07
	0.0000000025	5.93567251461988E-07
	4.21052631578947E-09	1.19587628865979E-07
	4.41176470588235E-09	5.01432664756447E-07
	1.66666666666667E-08	2.91666666666667E-07
	2.43589743589744E-08	1.21666666666667E-07
	4.71057884231537E-08	7.39153439153439E-07
GMI1000 pRalta imuC2	0.00000000015625	0.00000001875
	6.80272108843537E-10	1.33333333333333E-08
	7.69230769230769E-10	2.66666666666667E-09
	8.88888888888889E-10	7.56793945648435E-09
	1.10041265474553E-09	6.49717514124294E-09
	1.13378684807256E-09	2.29489386115892E-09
	1.44927536231884E-09	7.03703703703704E-09
	1.66666666666667E-09	1.36986301369863E-08
	2.26757369614512E-09	6.94444444444445E-09
	3.03030303030303E-09	1.03286384976526E-08
	9.03225806451613E-09	1.59139784946237E-08
GMI1000 pRaltaDimuA2B2C2	1.87617260787993E-10	4.62519936204147E-09
	3.08641975308642E-10	5.29100529100529E-09
	3.41880341880342E-10	1.12359550561798E-08
	8.06451612903226E-10	1.52979066022544E-08
	9.56022944550669E-10	8.18181818181818E-09
	1.35135135135135E-09	9.16666666666667E-09
	2.06398348813209E-09	3.39506172839506E-08
	5.45454545454545E-09	1.7921146953405E-08
	7.40740740740741E-09	1.57977883096367E-08
	7.84313725490196E-09	1.7017017017017E-08
GMI1000::imuA2B2C2 pRaltaDimuA2B2C2	8.25309491059147E-10	7.66666666666667E-08
	8.7719298245614E-10	5.77247191011236E-07
	1.55763239875389E-09	1.03282828282828E-07
	1.85185185185185E-09	0.0000014375
	2.02429149797571E-09	4.48979591836735E-08
	2.04498977505113E-09	5.93525179856115E-07
	2.36559139784946E-09	4.89784946236559E-07
	2.64550264550265E-09	3.77110694183865E-07
	2.95698924731183E-09	3.30045523520486E-07
	4.25531914893617E-09	3.14543889845095E-07
	1.12903225806452E-08	3.83906633906634E-07
	1.48936170212766E-08	0.000000445
GMI1000::imuA2B2C2	6.66666666666667E-10	3.50266507124986E-07
	8.7719298245614E-10	3.32657200811359E-06
	1.06060606060606E-09	0.00000045625
	2.33333333333333E-09	0.000000625
	2.8735632183908E-09	1.92753623188406E-06
	3.74531835205993E-09	5.03225806451613E-07
	4.16666666666667E-09	0.0000013599062133646
	4.41176470588235E-09	6.3030303030303E-07
	1.03030303030303E-08	1.89138576779026E-06
	1.86147186147186E-08	5.23913043478261E-07
