# Supplementary material for: Transient Hypermutagenesis Accelerates the Evolution of Legume Endosymbionts following Horizontal Gene Transfer
Source: PLoS Biol. 2014 Sep 2;12(9):e1001942. doi: 10.1371/journal.pbio.1001942 (PMC4151985; doi:10.1371/journal.pbio.1001942)
Supplement: Data S4 — Raw data for Figure S1. (XLSX) [file pbio.1001942.s016.xlsx]

## Sheet: data FigS1
Data S4: raw data for Figure S1
Fluctuation test. Frequency of appearance of nalidixic acid resistant clones.
Strain	Number of nalidixic acid resistant bacteria	Total number of bacteria*
GMI1000	1	1.36667e+09
	3	1.36667e+09
	3	1.36667e+09
	1	1.36667e+09
	1	1.36667e+09
	2	1.36667e+09
	1	1.36667e+09
	0	1.36667e+09
	0	1.36667e+09
	0	1.36667e+09
	0	1.36667e+09
	0	1.36667e+09
	0	1.36667e+09
	1	1.36667e+09
	0	1.36667e+09
	0	1.36667e+09
	0	1.36667e+09
	1	1.36667e+09
	0	1.36667e+09
	12	1.36667e+09
	1	1.36667e+09
	1	1.36667e+09
	3	1.36667e+09
GMI1000 mutS	2	400000000
	1	400000000
	0	400000000
	1	400000000
	0	400000000
	1	400000000
	0	400000000
	0	400000000
	2	400000000
	0	400000000
	1	400000000
	2	400000000
	1	400000000
	1	400000000
	1	400000000
	2	400000000
	0	400000000
	19	400000000
	4	400000000
	1	400000000
	0	400000000
	2	400000000
	1	400000000
GMI1000 pRalta	1	800000000
	0	800000000
	0	800000000
	0	800000000
	0	800000000
	0	800000000
	4	800000000
	5	800000000
	0	800000000
	0	800000000
	0	800000000
	0	800000000
	0	800000000
	1	800000000
	0	800000000
	0	800000000
	0	800000000
	5	800000000
	0	800000000
	0	800000000
	2	800000000
	1	800000000
	0	800000000
CBM212	9	1.06667e+09
	0	1.06667e+09
	0	1.06667e+09
	0	1.06667e+09
	18	1.06667e+09
	1	1.06667e+09
	2	1.06667e+09
	2	1.06667e+09
	1	1.06667e+09
	0	1.06667e+09
	0	1.06667e+09
	1	1.06667e+09
	1	1.06667e+09
	0	1.06667e+09
	0	1.06667e+09
	0	1.06667e+09
	0	1.06667e+09
	1	1.06667e+09
	2	1.06667e+09
	3	1.06667e+09
	0	1.06667e+09
	0	1.06667e+09
	0	1.06667e+09
CBM349	0	1000000000
	0	1000000000
	0	1000000000
	1	1000000000
	0	1000000000
	0	1000000000
	0	1000000000
	1	1000000000
	0	1000000000
	0	1000000000
	0	1000000000
	1	1000000000
	1	1000000000
	0	1000000000
	0	1000000000
	1	1000000000
	7	1000000000
	1	1000000000
	11	1000000000
	0	1000000000
	0	1000000000
	0	1000000000
	0	1000000000
CBM356	21	1400000000
	0	1400000000
	0	1400000000
	0	1400000000
	1	1400000000
	0	1400000000
	1	1400000000
	33	1400000000
	0	1400000000
	3	1400000000
	3	1400000000
	0	1400000000
	0	1400000000
	0	1400000000
	0	1400000000
	0	1400000000
	0	1400000000
	0	1400000000
	0	1400000000
	0	1400000000
	1	1400000000
	0	1400000000
	0	1400000000
* number of total bacteria was estimated by plating bacteria dilutions from one of the 23 tubes
